# Supplementary material for: Algorithmic management: Psychological measurement and associations with work design and mental strain
Source: Research Square preprint supplement (doi:10.21203/rs.3.rs-6508612/v1), 2025-05-12
Supplement: Supplementary file 2 [file 9a02a1480accedbfd8066aab.docx]

**Appendix III**

**Table S1**

Predictive validity results

|  | Work pace |  | Autonomy |  | Irritation |
| --- | --- | --- | --- | --- | --- |
| Variable | Est. |  | Est. |  | Est. |
| Gender | .086 |  | -.070 |  | -.037 |
| Age | .077 |  | -.099 |  | -.087 |
| Clickworker | -.232*** |  | -.063 |  | -.011 |
| Delivery | -.136 |  | -.115 |  | -.252*** |
| COMAMA | .351*** |  | -.148* |  | .301*** |
| *R*2 | .199 |  | .041 |  | .152 |

*Note.*. * indicates *p* < .05. ** indicates *p* < .01. *** indicates *p* < .001. The reference group gender is male. The reference group of the three samples is the logistics sample
